# Supplementary material
Source: Springer Nature journal article supplement (https://www.springermedizin.de/resource/supplementary/12936_2011_1695_MOESM1_ESM.pdf/9542382)
Supplement: MOESM1 [file 9542382]

Total CMV Consultations  
**17130**

Male adults and children > 5 y  
**25 (19+6)**

Patients receiving referral advice  
**2554**

Patients < 3 months or pregn. women 3<sup>rd</sup> trim.  
**53 (51+2)**

Eligible patients included in study  
**2459**

Patients with incomplete/un-interpretable data  
**17**

Pregnant women  
**417**

Children < 5 y  
**2042**

RDT positive w. danger signs  
**17**

RDT negative  
**2442**

Arrived  
**15 (88.2%)**

Arrived  
**21 (0.9%)**
